# Supplementary material for: Formulation of Mentha piperita-Based Nanobiopesticides and Assessment of the Pesticidal and Antimicrobial Potential
Source: MDPI journal article supplement (doi:10.3390/life14010144), 2024-01-19
Supplement: s1 [file s1]

Supplementary information

# Formulation of *Mentha piperita* -Based Nano Biopesticides and Assessment of the Pesticidal and Antimicrobial Potential

Nazish Jahan <sup>1,†</sup>, Nida Hussain <sup>1</sup>, Syeeda Iram Touqeer <sup>1</sup>, Khalil-Ur-Rahman <sup>2</sup>, Huma Shamshad <sup>1</sup> and Naseem Abbas <sup>3,\*</sup>

<sup>1</sup> Department of Chemistry, University of Agriculture, Faisalabad 38000, Pakistan; nazishjahan@uaf.edu.pk (N.J.); nidahussain116@gmail.com (N.H.); iram\_touqeer@yahoo.com (S.I.T.); dogarhuma@gmail.com (H.S.)

<sup>2</sup> Department of Biochemistry, Riphah International University, Faisalabad 38000, Pakistan; khaliluaf@yahoo.com

<sup>3</sup> Department of Mechanical Engineering, Sejong University, Seoul 05006, Republic of Korea

\* Correspondence: naseem.abbas@sejong.ac.kr

† These authors contributed equally to this work.

The plate images for antimicrobial activity experiments are given in supplementary materials with Figure S1-to Figure S3 whereas, the plate images for antifungal activity experiments are given in supplementary materials with Figure S4-to Figure S7.

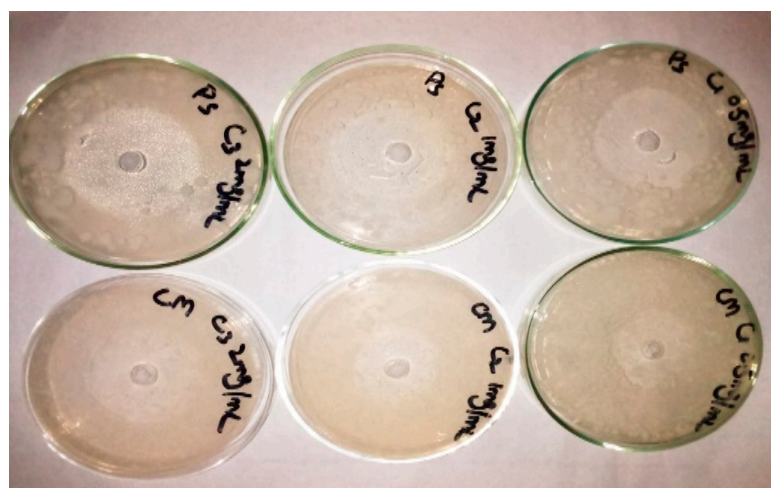

**Figure S1.** Zones of inhibition against *C. michiganensis* and *P. syringae* for control Ciprofloxacin.

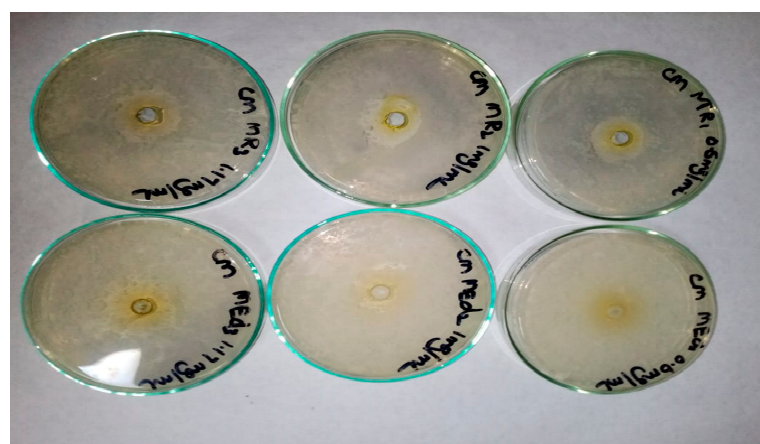

**Figure S2.** Zones of inhibition for *Mentha piperita* extract and nanosuspensions against *C. michiganensis*.

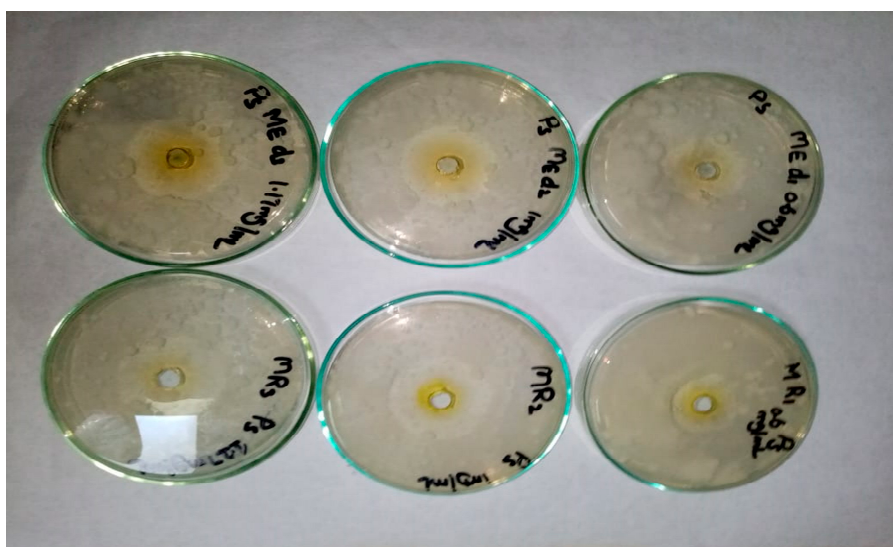

**Figure S3:** Zones of inhibition for *Mentha piperita* extract and nanosuspensions against *P. syringae*

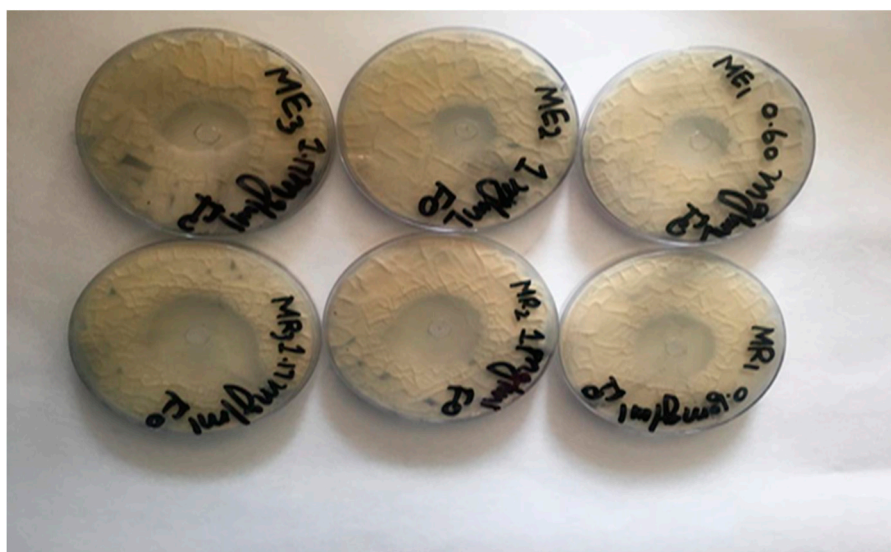

**Figure S4:** Zones of inhibition for *Mentha piperita* extract and nanosuspensions against *F. oxysporum*

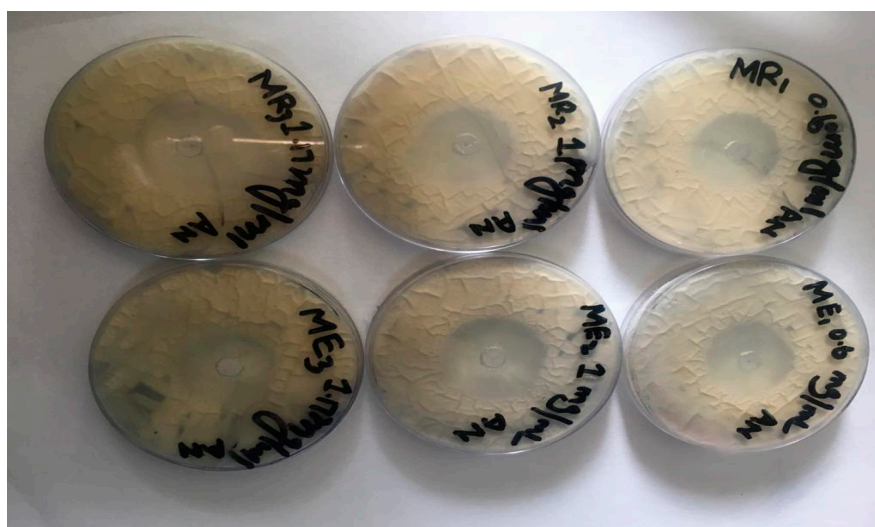

**Figure S5.** Zones of inhibition for *Mentha piperita* extract and nanosuspensions against *A. niger*

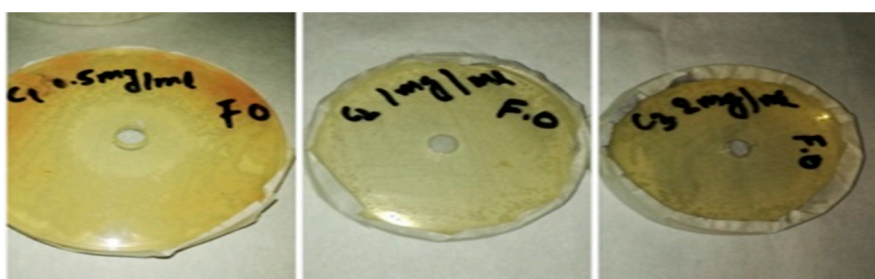

**Figure S6:** Zones of inhibition against *F. oxysporum* for control Voriconazole

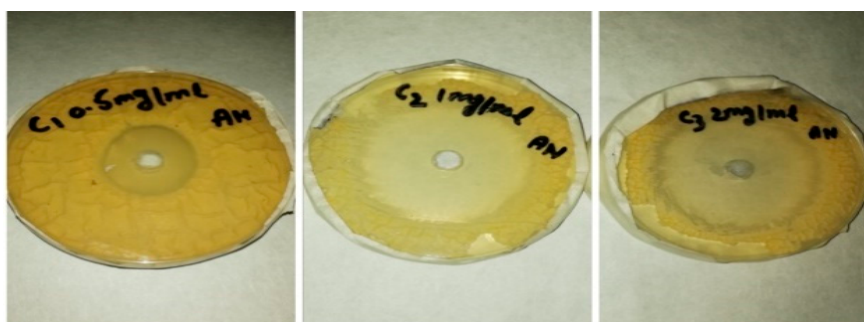

**Figure S7:** Zones of inhibition against *A. niger* for control Voriconazole
